# Supplementary material for: Silicon-Doped Carbon Dots Crosslinked Carboxymethyl Cellulose Gel: Detection and Adsorption of Fe3+
Source: MDPI journal article supplement (doi:10.3390/gels10050285), 2024-04-23
Supplement: s1 [file s1]

# Supporting Information

## Silicon-Doped Carbon Dots Crosslinked Carboxymethyl Cellulose Gel: Detection and Adsorption of Fe<sup>3+</sup>

### Section 1: Si-CDs structural analysis

The full XPS spectrum of CMCS (Figure S1a) shows the presence of four elements, C, N, O, and Na. In the C 1s spectrum of CMCS (Figure S1b), C-C, C-N, C-O, C=O correspond to 284.80, 285.45, 286.55, 288.55 eV. In the N 1s spectrum of CMCS (Figure S1c), N-C, N-H correspond to 399.15, 399.95 eV. In the O 1s spectrum of CMCS (Figure S2d), O-H, O-C, O=C correspond to 531.35, 532.25, 533.25 eV[22].

Table S1. Peak fitting data of XPS for 5Si-CDs

| Peak    | Binding Energy (eV) | FWHM | Peak | Binding Energy (eV) | FWHM |
|---------|---------------------|------|------|---------------------|------|
| C-O/C=O | 287.43              | 1.30 | O=C  | 533.99              | 1.40 |
| C-N     | 285.68              | 0.99 | O-Si | 531.73              | 2.18 |
| C-C     | 284.80              | 1.10 | O-C  | 530.04              | 1.64 |
| C-Si    | 283.74              | 1.45 | Si-O | 101.83              | 0.96 |
| N-H     | 400.30              | 1.78 | Si-N | 101.01              | 0.95 |
| N-C     | 399.23              | 1.12 | Si-C | 100.09              | 0.90 |
| N-Si    | 398.08              | 1.33 |      |                     |      |

Table S2. Peak fitting data of XPS for CMCS

| Peak | Binding Energy (eV) | FWHM | Peak | Binding Energy (eV) | FWHM |
|------|---------------------|------|------|---------------------|------|
| C=O  | 288.55              | 1.60 | N-C  | 399.15              | 1    |
| C-O  | 286.55              | 1.56 | O=C  | 533.25              | 1.87 |
| C-N  | 285.45              | 0.88 | O-C  | 532.25              | 1.36 |
| C-C  | 284.80              | 0.81 | O-H  | 531.35              | 1.19 |
| N-H  | 399.95              | 1.08 |      |                     |      |

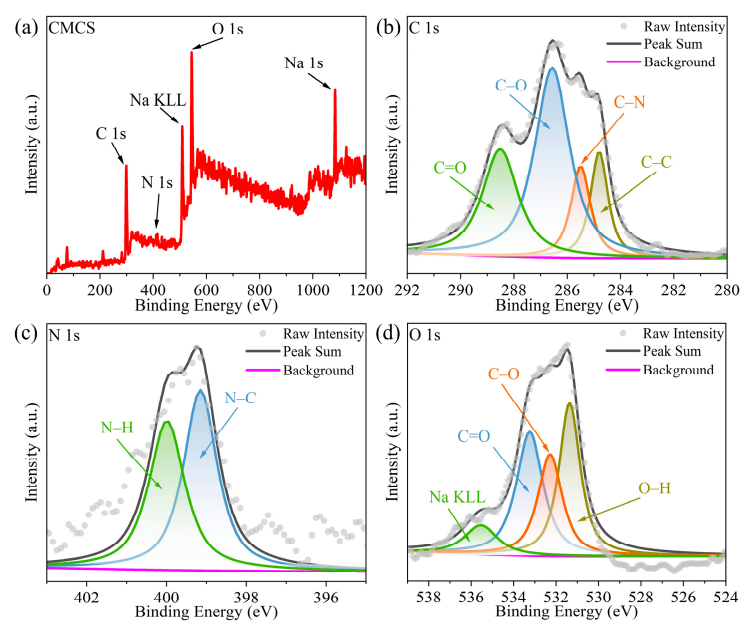

**Figure S1.** XPS spectra of CMCS. (a) Full spectrum, (b) C 1s fitting spectra, (c) N 1s fitting spectra, (d) O 1s fitting spectra.

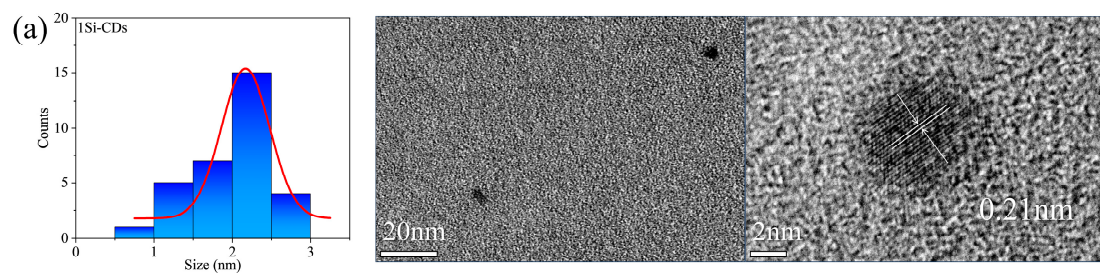

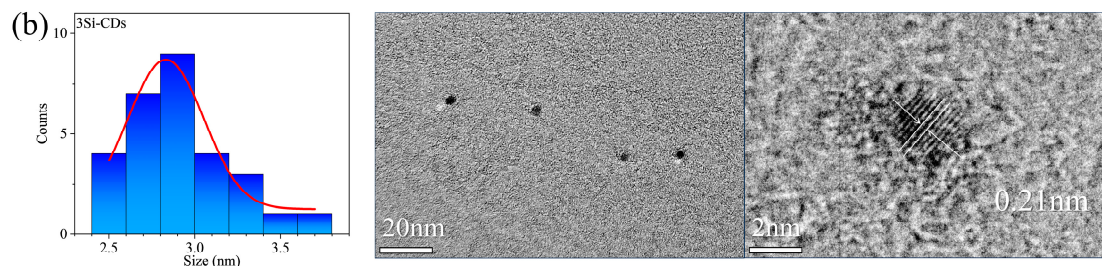

**Figure S2.** Histograms of particle size distribution, TEM images and HRTEM images of (a) 1Si-CDs, (b) 3Si-CDs.

## Section 2: DCG structural analysis

The full XPS spectrum of CMC (Figure S2a) shows the presence of four elements, C, O, and Na. In the C 1s spectra of CMC (Figure S1b), C-C, C-O, C=O correspond to 284.80, 286.21, 287.73 eV. In the O 1s spectra of CMC (Figure S2c), O-H, O-C, O=C correspond to 530.98, 532.08, 533.23 eV[57].

Table S3. Peak fitting data of XPS for 5DCG

| Peak     | Binding Energy (eV) | FWHM | Peak     | Binding Energy (eV) | FWHM |
|----------|---------------------|------|----------|---------------------|------|
| C-O/C=O  | 287.05              | 2.13 | O=C      | 533.27              | 1.99 |
| C-N      | 285.50              | 1.51 | O-Si/O-C | 532.00              | 1.54 |
| C-C/C-Si | 284.00              | 1.73 | O-H      | 530.88              | 2.17 |
| N-H      | 400.94              | 1.79 | Si-O     | 102.30              | 1.62 |
| NH-C=O   | 399.73              | 1.80 | Si-N     | 101.76              | 0.94 |
| N-Si     | 398.80              | 1.32 | Si-C     | 100.97              | 0.94 |

Table S4. Peak fitting data of XPS for CMC

| Peak | Binding Energy (eV) | FWHM | Peak | Binding Energy (eV) | FWHM |
|------|---------------------|------|------|---------------------|------|
| C=O  | 287.73              | 1.89 | O=C  | 533.23              | 1.89 |
| C-O  | 286.21              | 1.81 | O-C  | 532.08              | 1.66 |
| C-C  | 284.80              | 1.95 | O-H  | 530.98              | 2.05 |

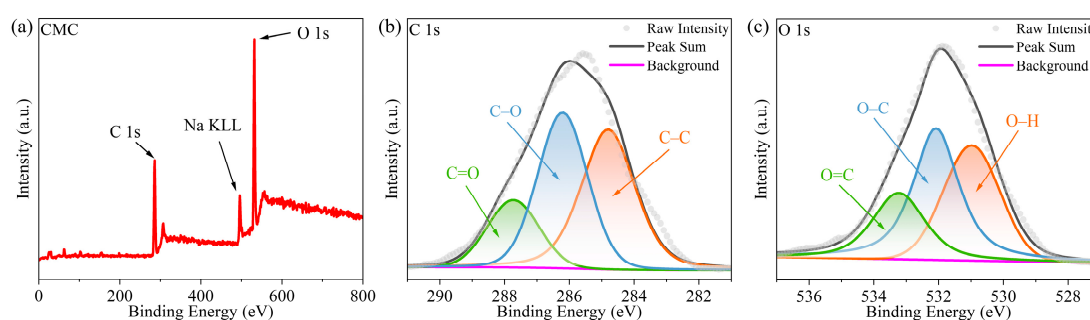

**Figure S3.** XPS spectra of CMC. (a) Full spectrum, (b) C 1s fitting spectra, (c) N 1s fitting spectra, (d) O 1s fitting spectra.

**XRD tests:** X-ray diffraction patterns were carried out using a CuK $\alpha$  ( $\lambda = 1.542 \text{ \AA}$ ) radiation monochromator with a scanning range of 5-90°.

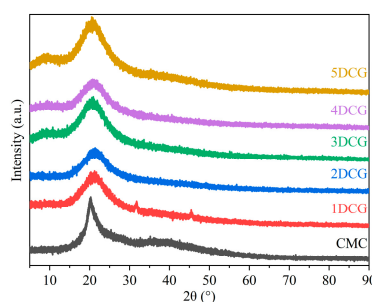

**Figure S4.** XRD spectra of CMC and DCG

## Section 3 Analysis of Fluorescence Properties

Photoluminescence Spectrometer (FLS1000) was used to measure the fluorescence lifetime. The fluorescence decay curves of Si-CDs consistently adhere to a second-order exponential function, exhibiting correlation coefficients ( $R^2$ ) greater than 0.97. The calculated fluorescence lifetimes consistently fall within the millisecond range[58].

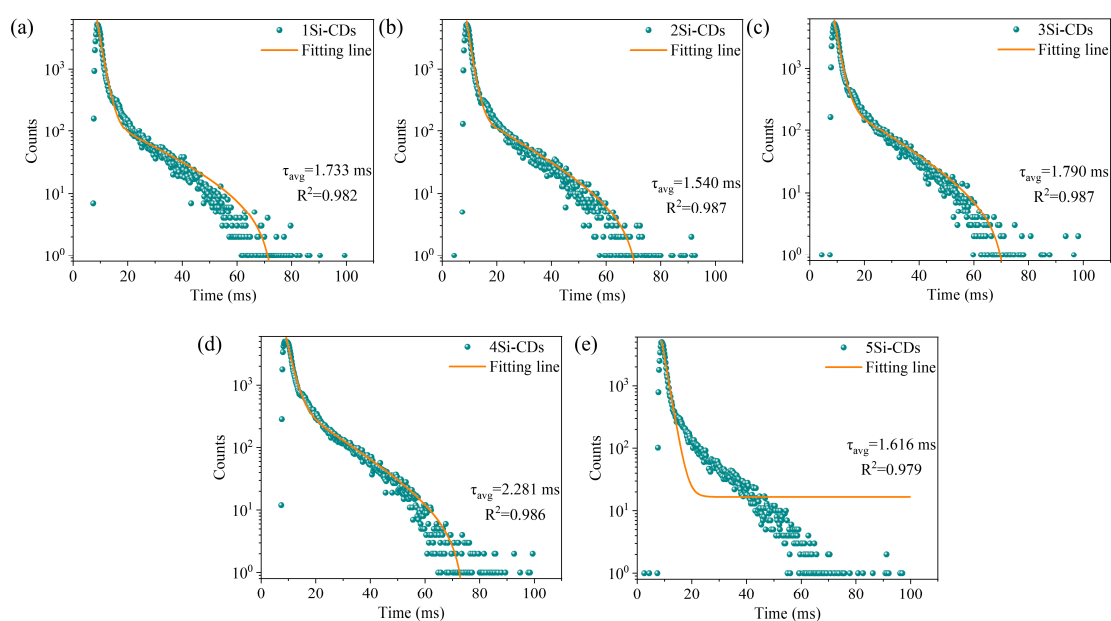

**Figure S5.** Fluorescence emission lifetime decay diagram and fitting curve of (a) 1Si-CDs, (b) 2Si-CDs, (c) 3Si-CDs, (d) 4Si-CDs and (e) 5Si-CDs

## References

22. Li, Y., Z. Zhang, Z. Fu, D. Wang, C. Wang and J. Li. "Fluorescence response mechanism of green synthetic carboxymethyl chitosan-Eu<sup>3+</sup> aerogel to acidic gases." *International Journal of Biological Macromolecules* 192 (2021): 1185-95. 10.1016/j.ijbiomac.2021.10.073. <https://doi.org/10.1016/j.ijbiomac.2021.10.073>.
57. Ye, J., B. Wang, J. Xiong and R. Sun. "Enhanced fluorescence and structural characteristics of carboxymethyl cellulose/Eu(III) nano-complex: Influence of reaction time." *Carbohydr Polym* 135 (2016): 57-63. 10.1016/j.carbpol.2015.08.063. <http://dx.doi.org/10.1016/j.carbpol.2015.08.063>.

58. Röding, M., S. J. Bradley, M. Nydén and T. Nann. "Fluorescence lifetime analysis of graphene quantum dots." *Journal of Physical Chemistry C* 118 (2014): 30282-90. 10.1021/jp510436r. <https://doi.org/10.1021/jp510436r>.
